# Supplementary material for: Lesion Topography and Microscopic White Matter Tract Damage Contribute to Cognitive Impairment in Symptomatic Carotid Artery Disease
Source: PubMed Central journal article supplement — Radiology. 2016 Sep 6;282(2):502–15. doi: 10.1148/radiol.2016152685 (PMC5283872; doi:10.1148/radiol.2016152685), 2016-09-06
Supplement: ry152685suppa1.pdf [file ry152685suppa1.pdf]

## Appendix E1

The intra- and interrater reliability was 0.821 (95% CI: 0.693, 0.948;  $P < .001$ ) and 0.770 (95% CI: 0.636, 0.903;  $P < .001$ ), respectively. Of 50 subjects who had coronal T1-weighted images, 12 subjects (24%) had MTA. The agreement between MTA assessment on FLAIR images and that on coronal T1-weighted images was 0.803 (95% CI: 0.620, 0.985;  $P < .001$ ).

**Table E1. Lesion Volumes and Cognition in Patients without MTA**

| Parameter                                                                                           | Patients with Normal Cognition ( $n = 52$ ) | Patients with Abnormal Cognition ( $n = 33$ ) | $P$ Value*          | Correlation with Global Cognition |                        | Correlation with Fluency |                        |
|-----------------------------------------------------------------------------------------------------|---------------------------------------------|-----------------------------------------------|---------------------|-----------------------------------|------------------------|--------------------------|------------------------|
|                                                                                                     |                                             |                                               |                     | $R^2$ Value                       | $P$ Value <sup>†</sup> | $R^2$ Value              | $P$ Value <sup>‡</sup> |
| Mean age (y) <sup>§</sup>                                                                           | 72.3 ± 9.4                                  | 76.7 ± 9.4                                    | .039                | ...                               | ...                    | ...                      | ...                    |
| Mean ACE-R score <sup>§</sup>                                                                       | 89.9 ± 4.3                                  | 73.7 ± 7.1                                    | <.001 <sup>  </sup> | ...                               | ...                    | ...                      | ...                    |
| No. of patients with lacunar infarctions                                                            | 8 (15.4)                                    | 10 (30.3)                                     | .185                | ...                               | ...                    | ...                      | ...                    |
| Percentage normalized lacunar infarction volumes ( $\times 10^{-5}$ ) <sup>§</sup>                  | 0.8 ± 2.7                                   | 3.4 ± 8.0                                     | .053                | 0.06                              | .030 <sup>  </sup>     | 0.08                     | .007 <sup>  </sup>     |
| No. of patients with acute lesions                                                                  | 17 (32.7)                                   | 17 (51.5)                                     | .044 <sup>  </sup>  | ...                               | ...                    | ...                      | ...                    |
| Percentage normalized acute lesion volumes ( $\times 10^{-4}$ ) <sup>§</sup>                        | 2.3 ± 4.8                                   | 6.0 ± 11.3                                    | .017 <sup>  </sup>  | 0.06                              | .020 <sup>  </sup>     | 0.04                     | .068                   |
| Percentage normalized chronic subcortical ischemic lesion volumes ( $\times 10^{-3}$ ) <sup>§</sup> | 7.9 ± 10.7                                  | 14.2 ± 15.5                                   | .045 <sup>  </sup>  | 0.01                              | .202                   | 0.04                     | .070                   |
| No. of patients with cortical infarctions                                                           | 0 (0)                                       | 2 (6.1)                                       | .023 <sup>  </sup>  | ...                               | ...                    | ...                      | ...                    |

Note.—Numbers in parentheses are percentages.

\*  $P$  value for the comparison between patients with normal cognition and those with abnormal cognition, controlled for age.

†  $P$  value for the correlation between lesion volumes and global cognitive performance, controlled for age.

‡  $P$  value for the correlation between lesion volumes and fluency, controlled for age.

§ Data are means ± standard deviations.

|| Statistically significant ( $P < .05$ ).

**Table E2. Severity of Tissue Damage and Global Cognitive Performance in Patients without MTA**

| Parameter                                                                                                 | Normal Cognition ( $n = 52$ ) | Abnormal Cognition ( $n = 33$ ) | $P$ Value*          | Correlation with Global Cognition |                        | Correlation with Fluency |                        |
|-----------------------------------------------------------------------------------------------------------|-------------------------------|---------------------------------|---------------------|-----------------------------------|------------------------|--------------------------|------------------------|
|                                                                                                           |                               |                                 |                     | $R^2$ Value                       | $P$ Value <sup>†</sup> | $R^2$ Value              | $P$ Value <sup>‡</sup> |
| Chronic subcortical ischemic lesion mean diffusivity ( $\times 10^{-9}$ m <sup>2</sup> /sec) <sup>§</sup> | 0.99 ± 0.11                   | 1.03 ± 0.09                     | .086                | 0.04                              | .061                   | 0.02                     | .211                   |
| NAWM mean diffusivity ( $\times 10^{-9}$ m <sup>2</sup> /sec) <sup>§</sup>                                | 0.75 ± 0.03                   | 0.77 ± 0.04                     | .047 <sup>  </sup>  | 0.10                              | .004 <sup>  </sup>     | 0.04                     | .076                   |
| Main skeleton mean diffusivity ( $\times 10^{-9}$ m <sup>2</sup> /sec) <sup>§</sup>                       | 0.78 ± 0.03                   | 0.83 ± 0.05                     | <.001 <sup>  </sup> | 0.30                              | <.001 <sup>  </sup>    | 0.20                     | <.001 <sup>  </sup>    |

\*  $P$  value for the comparison between patients with normal cognition and those with abnormal cognition, controlled for age.

<sup>†</sup> *P* value for the age-independent correlation between mean diffusivity of chronic subcortical ischemic lesions, NAWM, WMT skeleton, and global cognitive performance.

<sup>‡</sup> *P* value for the age-independent correlation between mean diffusivity of chronic subcortical ischemic lesions, NAWM, WMT skeleton, and global cognitive performance in subjects without MTA.

<sup>§</sup> Data are means ± standard deviations.

<sup>||</sup> Statistically significant (*P* < .05).

**Table E3. Predictive Value of Each Imaging Marker in Global Cognition**

| Parameter                                                 | Exp( $\beta$ ) Value | 95% CI for Exp( $\beta$ ) Value | <i>P</i> Value |
|-----------------------------------------------------------|----------------------|---------------------------------|----------------|
| Normalized volume of chronic subcortical ischemic lesions | 0.991                | 0.945, 1.039                    | .707           |
| Mean diffusivity of chronic subcortical ischemic lesions  | 1.023                | 0.597, 1.751                    | .935           |
| NAWM mean diffusivity                                     | 0.431                | 0.053, 3.491                    | .430           |
| Skeleton mean diffusivity                                 | 38.880               | 4.207, 359.336                  | .001*          |
| MTA score                                                 | 6.074                | 1.426, 25.867                   | .015*          |

\* Statistically significant (*P* < .05).
